# Supplementary material for: From Alpha to Delta—Genetic Epidemiology of SARS-CoV-2 (hCoV-19) in Southern Poland
Source: MDPI journal article supplement (doi:10.3390/pathogens11070780), 2022-07-08
Supplement: s1 [file s1]

Table S1. The frequency of mutations in the spike protein over time [%]. The analysis was carried out in the Nextstrain domain.

| Mutation       | February 2021 | March 2021 | April 2021 | May 2021 | June 2021 | July 2021 | August 2021 |
|----------------|---------------|------------|------------|----------|-----------|-----------|-------------|
| ΔH69/V70 (-)   | 66.66         | 91.59      | 96.39      | 96.66    | 85.71     | 6.06      | 46.15       |
| ΔY144          | 22.22         | 86.55      | 95.79      | 96.33    | 100       | 3.03      | 7.69        |
| N501Y          | 22.22         | 85.71      | 96.99      | 96.66    | 100       | 6.06      | 7.69        |
| A570D          | 33.33         | 86.55      | 96.09      | 96.66    | 85.71     | 6.06      | 0           |
| D614G          | 100           | 98.31      | 99.09      | 99       | 100       | 100       | 92.3        |
| P681H          | 33.33         | 86.55      | 96.09      | 96.66    | 100       | 6.06      | 7.69        |
| T716I          | 22.22         | 86.55      | 95.19      | 96.66    | 100       | 3.03      | 0           |
| S982A          | 22.22         | 95.19      | 95.19      | 96.66    | 100       | 6.06      | 0           |
| D1118H         | 22.22         | 95.19      | 95.79      | 96.66    | 100       | 6.06      | 0           |
| S98F           | 0             | 4.20       | 4.50       | 1        | 0         | 0         | 0           |
| L5F            | 0             | 1.68       | 5.70       | 4        | 0         | 0         | 0           |
| T19R           | 0             | 0          | 0          | 1.66     | 0         | 57.57     | 69.23       |
| G142D          | 0             | 0          | 0          | 1.66     | 0         | 66.66     | 92.3        |
| ΔE156/E157 (-) | 0             | 0          | 0          | 1.66     | 0         | 63.63     | 92.3        |
| R158G          | 0             | 0          | 0.3        | 1.66     | 0         | 63.63     | 92.3        |
| T478K          | 0             | 0          | 0.3        | 3        | 0         | 63.63     | 92.3        |
| L452R          | 0             | 0          | 0          | 1.66     | 0         | 66.66     | 92.3        |
| D950N          | 0             | 0          | 0          | 1.66     | 0         | 63.63     | 84.61       |
| ST95I          | 0             | 0          | 0          | 1.66     | 0         | 66.66     | 92.3        |
| P681R          | 0             | 0          | 0          | 1.66     | 0         | 63.63     | 84.61       |
